# Supplementary material for: GACNNMDA: a computational model for predicting potential human microbe-drug associations based on graph attention network and CNN-based classifier
Source: BMC Bioinformatics. 2023 Feb 2;24:35. doi: 10.1186/s12859-023-05158-7 (PMC9893988; doi:10.1186/s12859-023-05158-7)
Supplement: Supplementary file 2 — Additional file 2: The newly downloaded dataset of drugs. [file 12859_2023_5158_MOESM2_ESM.xlsx]

## Sheet: Sheet1
Table 2 The ID Numbers and Names of Newly-Downloaded Drugs
Drug_ID	Drug_name
1	(1-(4-chlorophenoxy)-3-[(4, 6-dimethyl-2-pyrimidinyl) thio]-2- propanol)
2	(10R,11R)-Hydnocarpin
3	(10R,11R)-Hydnocarpin D
4	(10S,11S)-Hydnocarpin D
5	(1E)-1-{[(1E)-prop-1-ene-1-sulfinyl]sulfanyl}prop-1-ene
6	(1R,2S,7R,3E,11E)-2,18-diacetoxycembra-3,8(19),11,15(17)-tetraen-7-ol
7	(1R,2S,7R,3E,8E,11E)-2,18-diacetoxycembra-3,8,11,15(17)-tetraen-7-ol
8	(1R,2S,7R,8R)-2,18-diacetoxyasperdiol
9	(1R,3S,7R,8S,11S,12R)-3-hydroxy-1,4,8-trimethyl-12-(propan-2-yl)tricyclo[9.3.0.0]tetradec-4-en-6-one
10	(1R,4R,8S,11S,12R)-4-hydroxy-1,4,8-trimethyl-12-(propan-2-yl)tricyclo[9.3.0.0]tetradec-3(7)-en-6-one
11	(1Z)-(2-phenylethylidene)-lambda4-sulfanyliumolate
12	(1Z)-(prop-2-en-1-ylidene)-lambda4-sulfanyliumolate
13	(1Z)-ethylidene-lambda4-sulfanyliumolate
14	(2-(4-chlorophenyl)- 4-{[(6-methyl-2-pyridinyl)amino]methylene}-1,3-oxazol- 5(4H)-one)
15	(2-{[(2-phenylethyl)sulfanyl]sulfinyl}ethyl)benzene
16	(2E)-1-(1 ,3 -benzodioxol-5-yl)-3-(2-naphthyl)-2-propen-1-one
17	(2E)-1-(1,3-benzodioxol-5-yl)-3-(2-chloro-quinolin-3-yl)-2-propen-1-one
18	(2E)-1-(1,3-benzodioxol-5-yl)-3-[5-(2-nitro-phenyl)-furan-2-yl]-2-propen-1-one
19	(2E)-1-(2 ,4 ,5 -trimethoxyphenyl)-3-(2-chloro-6-methoxy-quinolin-3-yl)-2-propen-1-one
20	(2E)-1-(2 ,4 ,5 -trimethoxyphenyl)-3-(2-chloro-quinolin-3-yl)-2-propen-1-one
21	(2E)-1-(2 ,4 ,5 -trimethoxyphenyl)-3-(2-naphthyl)-2-propen-1-one
22	(2E)-1-(2 ,5 -dimethoxyphenyl)-3-(2-naphthyl)-2-propen-1-one
23	(2E)-1-(2 ,5 -dimethoxyphenyl)-3-[2,5-dimethyl-1-(3-trifluoromethyl-phenyl)-1H-pirrol-3-yl]-2-propen-1-one
24	(2E)-1-(3 ,4 ,5 -trimethoxyphenyl)-3-(2-naphthyl)-2-propen-1-one
25	(2E)-1-(3 ,4 -dimethoxyphenyl)-3-(2-naphthyl)-2-propen-1-one
26	(2E)-1-(3 ,5 -dimethoxyphenyl)-3-(2-naphthyl)-2-propen-1-one
27	(2E)-1-(3 -methoxyphenyl)-3-(2-naphthyl)-2-propen-1-one
28	(2E)-1-(4 -methoxyphenyl)-3-(2-naphthyl)-2-propen-1-one
29	(2E)-1-(5-clorotiophen-2-yl)-3-(3-methoxy-4-benzyloxi-phenyl)-2-propen-1-one
30	(2E)-1-[4 -(1H-imidazol-1-yl)phenyl]-3-(2-naphthyl)-2-propen-1-one
31	(2E)-1-[4 -(1H-imidazol-1-yl)phenyl]-3-(3-methoxy-4-benzyloxi-phenyl)-2-propen-1-one
32	(2E)-1-[4-(3-nitropyridin-2-yl)piperazin-1-yl]-3-phenylprop-2-en-1-one
33	(2E)-1-[4-(4-nitrophenyl)piperazin-1-yl]-3-phenylprop-2-en-1-one
34	(2E)-3-(3-hydroxy-4-methoxyphenyl)-1-phenylprop-2-en-1-one
35	(2E)-3-(4-Hydroxy-3-methoxyphenyl)-1-phenyl-2-propen-1-one
36	(2E)-5-[(1S,2R,4aR,8aR)-1,2,4a,5-tetramethyl-1,2,3,4,4a,7,8,8a-octahydronaphthalen-1-yl]-3-formylpent-2-enoic acid
37	(2E)-N -(2 -hydroxy-5 -bromo-benzilidene)-3,4,5-trimethoxybenzohydrazide
38	(2E)-N-(6-nitro-1,3-benzothiazol-2-yl)-3-phenylprop-2-enamide
39	(2E)-N-[3-(1H-imidazol-1-yl)propyl]-3-phenylprop-2-enamide
40	(2E)-N-[3-(1H-indol-3-yl)propyl]-3-phenylprop-2-enamide
41	(2-methyl-5-nitro-1H-imidazol-1-yl)methyl (2E)-3-phenylprop-2-enoate
42	(2R)-2-amino-3-(2,3-dihydro-1H-inden-2-yl)propanoic acid
43	(2R)-2-amino-3-(2-phenylethanesulfinyl)propanoic acid
44	(2R)-2-amino-3-(benzenesulfinyl)propanoic acid
45	(2R)-2-amino-3-(thiophene-2-sulfinyl)propanoic acid
46	(2R)-2-amino-3-[(4-chlorophenyl)methanesulfinyl]propanoic acid
47	(2R)-2-amino-3-[(4-methylphenyl)methanesulfinyl]propanoic acid
48	(2R)-2-amino-3-phenylmethanesulfinylpropanoic acid
49	(2R)-2-amino-4-phenylbutanoic acid
50	(2R)-2-amino-5-(1-nitrocarbamimidamido)pentanoic acid
51	(2R)-2-amino-6-acetamidohexanoic acid
52	(2R,3E)-2-Amino-4-phenyl-3-butenoic acid
53	(2S)-2-amino-3-(1,3-thiazol-4-yl)propanoic acid
54	(2S)-2-amino-3-(4-tert-butylphenyl)propanoic acid
55	(2S)-2-amino-3-(tert-butylsulfanyl)propanoic acid
56	(2S)-2-amino-4-bromopent-4-enoic acid
57	(2S,3R,4S,5S,6R)-3-(2-(1H-Indol-3-yl)acetamido)-6-(acetoxymethyl)tetrahydro-2H-pyran-2,4,5-triyl triacetate
58	(2S,3R,4S,5S,6R)-6-(Acetoxymethyl)-3-(2-(4-(trifluoromethyl)phenyl)acetamido)tetrahydro-2H-pyran-2,4,5-triyltriacetate
59	(2S,3R,4S,5S,6R)-6-(Acetoxymethyl)-3-(2-(4-bromophenyl)acetamido)tetrahydro-2H-pyran-2,4,5-triyl triacetate
60	(2S,3R,4S,5S,6R)-6-(Acetoxymethyl)-3-(2-(4-chlorophenyl)acetamido)tetrahydro-2H-pyran-2,4,5-triyl triacetate
61	(2S,3R,4S,5S,6R)-6-(Acetoxymethyl)-3-(2-(4-fluorophenyl)acetamido)tetrahydro-2H-pyran-2,4,5-triyl triacetate
62	(2S,3R,4S,5S,6R)-6-(Acetoxymethyl)-3-(2-(4-methoxyphenyl)acetamido)tetrahydro-2H-pyran-2,4,5-triyl triacetate
63	(2S,3R,4S,5S,6R)-6-(Acetoxymethyl)-3-(3-oxohexanamido)tetrahydro-2H-pyran-2,4,5-triyl triacetate
64	(2S,3R,4S,5S,6R)-6-(Acetoxymethyl)-3-(3-oxooctanamido)tetrahydro-2H-pyran-2,4,5-triyl triacetate
65	(2S,3R,4S,5S,6R)-6-(Acetoxymethyl)-3-butyramidotetrahydro-2H-pyran-2,4,5-triyl triacetate
66	(2S,3R,4S,5S,6R)-6-(Acetoxymethyl)-3-decanamidotetrahydro-2H-pyran-2,4,5-triyl triacetate
67	(2S,3R,4S,5S,6R)-6-(Acetoxymethyl)-3-dodecanamidotetrahydro-2H-pyran-2,4,5-triyl triacetate
68	(2S,3R,4S,5S,6R)-6-(Acetoxymethyl)-3-octanamidotetrahydro-2H-pyran-2,4,5-triyl triacetate
69	(2Z)-N-hexyl-2-hydroxy-3-[4-(trifluoromethyl)phenyl]prop-2-enamide
70	(3R)-4-(4-acetylphenyl)-3-aminobutan-2-one
71	(3R)-7-hydroxy-1,2,3,4-tetrahydroisoquinoline-3-carboxylic acid
72	(5E)-5-decylidene-1,3-thiazolidine-2,4-dione
73	(5E)-5-dodecylidene-1,3-thiazolidine-2,4-dione
74	(5E)-5-hexylidene-1,3-thiazolidine-2,4-dione
75	(5E)-5-octylidene-1,3-thiazolidine-2,4-dione
76	(5E)-5-undecylidene-1,3-thiazolidine-2,4-dione
77	(5-nitrofuran-2-yl)methyl (2E)-3-phenylprop-2-enoate
78	(5S)-1,7-bis(4-hydroxyphenyl)-5-O-_-D- apiofuranosyl(1 _ 6)-_-D-glucopyranosyloxyheptan-3-one
79	(5Z)-2-(1,1-dichloro-2-phenylethyl)-5-{[4-(trifluoromethyl)phenyl]methylidene}-1,3-oxazolidin-4-one
80	(5Z)-2-(1,1-dichloro-3,3-dimethylbutyl)-5-(phenylmethylidene)-1,3-oxazolidin-4-one
81	(5Z)-2-(1,1-dichloro-3,3-dimethylbutyl)-5-[(3-methoxyphenyl)methylidene]-1,3-oxazolidin-4-one
82	(5Z)-2-(1,1-dichloro-3,3-dimethylbutyl)-5-{[4-(trifluoromethyl)phenyl]methylidene}-1,3-oxazolidin-4-one
83	(5Z)-2-(1,1-dichloro-7-methyloctyl)-5-{[4-(trifluoromethyl)phenyl]methylidene}-1,3-oxazolidin-4-one
84	(5Z)-2-(1,1-dichlorobut-3-yn-1-yl)-5-{[4-(trifluoromethyl)phenyl]methylidene}-1,3-oxazolidin-4-one
85	(5Z)-2-(1,1-dichloropropyl)-5-{[4-(trifluoromethyl)phenyl]methylidene}-1,3-oxazolidin-4-one
86	(5Z)-2-(2,2-dimethylpropyl)-5-{[3-(trifluoromethyl)phenyl]methylidene}-1,3-oxazolidin-4-one
87	(5Z)-2-tert-butyl-5-{[3-(trifluoromethyl)phenyl]methylidene}-1,3-oxazolidin-4-one
88	(5Z)-4-Bromo-5-(bromomethylene)-3-butyl-2(5H)-furanone
89	(E)-1-[6-[(3-acetyl-2,4,6-trihydroxy-5-methylphenyl)methyl]-5,7-dihydroxy-2,2-dimethyl-2H-1-benzopyran-8-yl]-3-phenyl-2-propen-1-one
90	(E)-3-Decen-2-one
91	(E)-Chalcone
92	(furan-2-yl)methyl (2E)-3-phenylprop-2-enoate
93	(R)-2,3-Diaminopropanoic acid
94	(R)-2-Amino-3-biphenyl-3-yl-propionic acid
95	(R)-2-amino-3-cyclohexylpropanoic acid
96	(R)-2-amino-3-cyclopentylpropanoic acid
97	(RW)2-NH2
98	(RW)3-NH2
99	(RW)4D
100	(RW)4-NH2
101	(Z)-3-(bromomethylene) isobenzofuran-1(3H)-one
102	(Z)-3-bromo-5-(bromomethylene) furan-2(5H)-one
103	(Z)-4-bromo-5-(bromomethylene)-3-(1-bromobutyl)-2(5H)-furanone
104	(Z)-4-bromo-5-(bromomethylene)-3-(1-bromoethyl)-2(5H)-furanone
105	(Z)-4-bromo-5-(bromomethylene)-3-(1-bromohexyl)-2(5H)-furanone
106	(Z)-4-bromo-5-(bromomethylene)-3-butyl-2(5H)-furanone
107	(Z)-4-bromo-5-(bromomethylene)-3-ethyl-2(5H)-furanone
108	(Z)-4-bromo-5-(bromomethylene)-3-hexyl-2(5H)-furanone
109	(Z)-4-bromo-5-(bromomethylene)-3-methylfuran-2(5H)-one
110	(Z)-5-(bromomethylene)-3-(hydroxymethyl]thiophen-2(5H)- one
111	(Z)-5-(chloromethylene) furan-2(5H)-one
112	(Z)-5-decylidenethiazolidine-2,4-dione
113	(Z)-5-octylidenethiazolidine-2,4-dione
114	[(ethanesulfinyl)sulfanyl]ethane
115	1-(2,4-dichlorophenyl)-2-(1H-imidazol-1-yl)ethyl (2E)-3-phenylprop-2-enoate
116	1-(2-Chloroacetyl)-5-methylindoline-2,3-dione
117	1-(2-Chloroacetyl)indoline-2,3-dione
118	1-(3,5-dinitrophenyl)ethan-1-one
119	1-(4-amino-2-hydroxyphenyl)ethan-1-one
120	1-(4-chlorophenyl)-3-m-tolyurea
121	1-(4-chlorophenyl)-3-p-tolyurea
122	1-(4-methoxyphenyl)-3-m-tolyurea
123	1-(4-methoxyphenyl)-3-p-tolyurea
124	1-(6-aminopyridin-3-yl)ethan-1-one
125	1-(pyrazin-2-yl)ethan-1-one
126	1-(pyridin-4-yl)ethan-1-one
127	1,1,6,6,7,7-hexahydroxy-5,5-diisopropyl-3,3-dimethyl-2,2-binaphthalene-8,8-dicarbaldehyde
128	1,2,3,4-Tetrahydroisoquinoline-3-carboxylic acid
129	1,3-bis[3-chloro-5-(1,3-dichloropropane-2-yloxy)-2(5H)-furanone-4-ylsulfonyl]propane
130	1,3-dimethyl-6-(4-methylphenyl)-5-[3-(4-methylphenyl)-1-phenyl-1H-pyrazol-4-yl]-1H,2H,3H,4H,5H,6H-pyrimido[4,5-d][1,3]diazine-2,4-dione
131	1,3-dimethyl-6-(4-methylphenyl)-5-[3-(4-nitrophenyl)-1-phenyl-1H-pyrazol-4-yl]-1H,2H,3H,4H,5H,6H-pyrimido[4,5-d][1,3]diazine-2,4-dione
132	1,3-dim-tolyurea
133	1-[2-(2,4-dichlorophenyl)-5-(3,4,5-trimethoxyphenyl)-1,3,4-oxadiazol-3(2H)-yl]ethanone
134	1-[2-(2-nitrophenyl)-5-phenyl-1,3,4-oxadiazol-3(2H)-yl]ethanone
135	1-[2-(3,5-dichlorophenyl)-5-(3,4,5-trimethoxyphenyl)-1,3,4-oxadiazol-3(2H)-yl]ethanone
136	1-[2-(3-bromo-4-hydroxy-5-methoxyphenyl)-5-(3,4,5-trimethoxyphenyl)-1,3,4-oxadiazol-3(2H)-yl]ethanone
137	1-[2-(naphthalen-1-yl)-5-(3,4,5-trimethoxyphenyl)-1,3,4-oxadiazol-3(2H)-yl]ethanone
138	1-{2-[(E)-2-(4-chlorophenyl)ethenyl]-4-phenylquinolin-3-yl}ethan-1-one
139	1-{2-[(E)-2-(4-hydroxy-3-methoxyphenyl)ethenyl]-4-phenylquinolin-3-yl}ethan-1-one
140	1-{2-[(E)-2-(4-methoxyphenyl)ethenyl]-4-phenylquinolin-3-yl}ethan-1-one
141	1-{2-[(E)-2-[3,5-bis(trifluoromethyl)phenyl]ethenyl]-4-phenylquinolin-3-yl}ethan-1-one
142	1-{4-phenyl-2-[(E)-2-[4-(trifluoromethoxy)phenyl]ethenyl]quinolin-3-yl}ethan-1-one
143	1-{6-nitro-4-phenyl-2-[(E)-2-(3,4,5-trimethoxyphenyl)ethenyl]quinolin-3-yl}ethan-1-one
144	1-{6-nitro-4-phenyl-2-[(E)-2-[4-(trifluoromethoxy)phenyl]ethenyl]quinolin-3-yl}ethan-1-one
145	1010cys
146	11(R)-hydroxy-12(20)-en-knightal
147	11(R)-hydroxy-12(20)-en-knightol acetate
148	12-hydroxy decyl beta-maltose
149	12-methyltetradecanoic acid
150	13-(2-chloro-6-methoxyquinolin-3-yl)-3,3-dimethyl-1H,2H,3H,4H,4aH,6H,11H,13H,13aH-indazolo[1,2-b]phthalazine-1,6,11-trione
151	13-(2-chloro-6-methylquinolin-3-yl)-3,3-dimethyl-1H,2H,3H,4H,6H,11H,13H-indazolo[1,2-b]phthalazine-1,6,11-trione
152	13-(2-chloro-7-methoxyquinolin-3-yl)-3,3-dimethyl-1H,2H,3H,4H,6H,11H,13H-indazolo[1,2-b]phthalazine-1,6,11-trione
153	13-(2-chloro-7-methylquinolin-3-yl)-3,3-dimethyl-1H,2H,3H,4H,6H,11H,13H-indazolo[1,2-b]phthalazine-1,6,11-trione
154	13-(2-chloro-8a-methyl-4a,8a-dihydroquinolin-3-yl)-3,3-dimethyl-1H,2H,3H,4H,6H,11H,13H-indazolo[1,2-b]phthalazine-1,6,11-trione
155	13-(2-chloroquinolin-3-yl)-3,3-dimethyl-1H,2H,3H,4H,6H,11H,13H-indazolo[1,2-b]phthalazine-1,6,11-trione
156	13-{7-methoxy-[1,2,3,4]tetrazolo[1,5-a]quinolin-4-yl}-3,3-dimethyl-1H,2H,3H,4H,6H,11H,13H-indazolo[1,2-b]phthalazine-1,6,11-trione
157	13-{8-methoxy-[1,2,3,4]tetrazolo[1,5-a]quinolin-4-yl}-3,3-dimethyl-1H,2H,3H,4H,6H,11H,13H-indazolo[1,2-b]phthalazine-1,6,11-trione
158	13-methyltetradecanoic acid
159	14,15,29,30-Tetrahydro-5H,20H-dibenzo[h,s]bis([1,2,3]triazolo)[5,1-c:5_,1_-n][1,4,7,12,15,18]hexaazacyclodocosine-6,12,13,21,27,28(7H,22H)-hexaone
160	14-alpha-lipoyl andrographolide
161	14-dehydroxy-11,12-didehydroandrographolide- 3,19-bis(succinic acid) potasium sodium salt
162	14-Glycinyl andrographolide hydrochloride
163	16P
164	16P-AC
165	17-Deacetyl norgestimate
166	1-mesityl-3(4-nitrophenyl)urea
167	1-methanesulfonyl-4-methylbenzene
168	1-methyl-4-({[(4-methylphenyl)methyl]disulfanyl}methyl)benzene
169	2- geranyloxy-1-(2-methylbutanoyl)phloroglucinol
170	2-((3,4-dichlorophenyl)sulfonyl)-4-(1H-tetrazol-1-yl)pyrimidine
171	2-(2-(2-Azidoacetamido)-5-bromophenyl)-2-oxo-N-(prop-2-yn-1-yl)acetamide
172	2-(2-(2-Azidoacetamido)-5-fluorophenyl)-2-oxo-N-( prop-2-yn-1-yl)acetamide
173	2-(2-(2-Azidoacetamido)-5-methylphenyl)-2-oxo-N-(prop-2-yn-1-yl)acetamide
174	2-(2-(2-Azidoacetamido)-5-nitrophenyl)-2-oxo-N-(prop-2-yn-1-yl)acetamide
175	2-(2-(2-Azidoacetamido)phenyl)-2-oxo-N-(prop-2-yn-1-yl)acetamide
176	2-(2-(2-Chloroacetamido)-5-fluorophenyl)-2-oxo-N-( prop-2-yn-1-yl)acetamide
177	2-(2-(2-Chloroacetamido)-5-methylphenyl)-2-oxo-N-( prop-2-yn- 1-yl)acetamide
178	2-(2-(2-Chloroacetamido)-5-nitrophenyl)-2-oxo-N-( prop-2-yn-1-yl)acetamide
179	2-(2-(2-Chloroacetamido)phenyl )-2-oxo-N-( prop-2-yn-1-yl )acetamide
180	2-(2,4-difluorophenyl)-1,3-bis(1H-1,2,4-triazol-1-yl)propan-2-yl (2E)-3-phenylprop-2-enoate
181	2-(2-chloro-5-fluorophenyl)-5-(4,5-dibromo-1-methyl-1H-pyrrol-2-yl)-1,3,4-oxadiazole
182	2-(2-Thienylsulfonyl)ethanethioamide
183	2-(4-(Trifluoromethyl)phenyl)-N-((2R,3R,4S,5S,6R)-2,4,5-trihydroxy-6-(hydroxymethyl)tetrahydro-2H-pyran-3-yl)acetamide
184	2-(4,5-dibromo-1-methyl-1H-pyrrol-2-yl)-5-(2,4-dichlorophenyl)-1,3,4-oxadiazole
185	2-(4,5-dibromo-1-methyl-1H-pyrrol-2-yl)-5-(4-methoxyphenyl)-1,3,4-oxadiazole
186	2-(4,5-dibromo-1-methyl-1H-pyrrol-2yl)-5-(4-nitrophenyl)-1,3,4-oxadiazole
187	2-(4,5-dibromo-1-methyl-1H-pyrrol-2-yl)-5-(ethylthio)-1,3,4-oxadiazole
188	2-(4,5-dibromo-1-methyl-1H-pyrrol-2-yl)-5-(methylthio)-1,3,4-oxadiazole
189	2-(4,5-dibromo-1-methyl-1H-pyrrol-2-yl)-5-(phenylthio)-1,3,4-oxadiazole
190	2-(4,5-dibromo-1-methyl-1H-pyrrol-2-yl)-5-(pyridin-4-yl)-1,3,4-oxadiazole
191	2-(4,5-dibromo-1-methyl-1H-pyrrol-2-yl)-5-phenyl-1,3,4-oxadiazole
192	2-(4,5-dibromo-1-methyl-1H-pyrrol-2-yl)-5-styryl-1,3,4-oxadiazole
193	2-(4-Bromophenyl)-N-((2R,3R,4S,5S,6R)-2,4,5-trihydroxy-6-(hydroxymethyl)tetrahydro-2H-pyran-3-yl)acetamide
194	2-(4-Chlorophenyl)-5-(4,5-dibromo-1-methyl-1H-pyrrol-2-yl)-1,3,4-oxadiazole
195	2-(4-Chlorophenyl)-N-((2R,3R,4S,5S,6R)-2,4,5-trihydroxy-6-(hydroxymethyl)tetrahydro-2H-pyran-3-yl)acetamide
196	2-(4-Fluorophenyl)-N-((2R,3R,4S,5S,6R)-2,4,5-trihydroxy-6-(hydroxymethyl)tetrahydro-2H-pyran-3-yl)acetamide
197	2-(4-Methoxyphenyl)-N-((2R,3R,4S,5S,6R)-2,4,5-trihydroxy-6-(hydroxymethyl)tetrahydro-2H-pyran-3-yl)acetamide
198	2-(4-methoxyphenyl)-N-(3-{[2-(4-methoxyphenyl)ethyl]imino}-1,4-dihydro-2-quinox alinylidene)ethanamine
199	2-(5-(4,5-dibromo-1-methyl-1H-pyrrol-2-yl)-1,3,4-oxadiazole-2-yl)phenol
200	2-(5-Bromo-2-(2-chloroacetamido)phenyl )-2-oxo-N-( prop-2-yn-1-yl)acetamide
201	2-(5-Chloro-2-(2-chloroacetamido)phenyl )-2-oxo-N-( prop-2-yn-1-yl)acetamide
202	2(5H)-furanone
203	2-(Aminomethyl)-L-phenylalanine
204	2-(hexylsulfonyl)-4-(1H-1,2,3-triazol-1-yl)pyrimidine
205	2-(Trifluoromethyl)-D-phenylalanine
206	2,2 -Dipyridyl
207	2,3,4,5,6-Pentafluoro-L-phenylalanine
208	2,3-Dehydrosilybin
209	2,3-dihydroxybenzoic acid
210	2,4,5-Trifluorophenylalanine
211	2,4-Dichlorophenylalanine
212	2,4-Difluorophenylalanine
213	2,4-Dimethylphenylalanine
214	2,4-Dinitro-D-phenylalanine
215	2,5-bis(4,5-dibromo-1-methyl-1H-pyrrol-2-yl)-1,3,4-oxadiazole
216	2-amino-3-(2-nitrophenyl)propanoic acid
217	2-amino-3-(3-chlorophenyl)propanoic acid
218	2-amino-3-(3-nitrophenyl)propanoic acid
219	2-amino-3-(4-methylbenzenesulfinyl)propanoic acid
220	2-amino-3-(prop-2-ene-1-sulfinyl)propanoic acid
221	2-amino-3-(propane-1-sulfinyl)propanoic acid
222	2-amino-4-chlorobenzoic acid
223	2-amino-5-methoxy-5-oxopentanoic acid
224	2-amino-6-chlorobenzoic acid
225	2-amino-6-fluorobenzoic acid
226	2-amino-imidazole/ triazole conjugate
227	2-Benzyl-5-(4,5-dibromo-1-methyl-1H-pyrrol-2-yl)-1,3,4-oxadiazole
228	2-bromo-4-methyl-6-(3,4,5-tribromo-1H-pyrrole-2-carbonyl)phenol
229	2-bromodecanoic acid
230	2-bromohexanoic acid
231	2-bromooctanoic acid
232	2C-4
233	2-Carbamoylphenylalanine
234	2-Chloro-DL-Phenylalanine
235	2-Cyano-D-phenylalanine
236	2-Fluoro-L-phenylalanine
237	2-geranyloxy-1-(2-methylpropanoyl)phloroglucinol
238	2-geranyloxy-4,6-dihydroxybenzophenone
239	2-Hexylmaleic anhydride
240	2-Hydroxychalcone
241	2-Methoxy-4-propylphenol
242	2-methoxy-cinnamaldehyde
243	2-Methoxy-D-Phenylalanine
244	2-Methoxyhydroquinone
245	2-Nitro-cinnamaldehyde
246	2-oxindole
247	2-phenylethane-1-SO-thioperoxol
248	3-(1-Naphthyl)-D-Alanine
249	3-(2-Furyl)-D-alanine
250	3-(2-Furylmethyl)-2-{[(5-hydroxy-1H-pyrazol-3-yl)methyl]sulfanyl}-3,5,6,7-tetrahydro-4H-cyclopenta[4,5]thieno[2,3-d]pyrimidin-4-one
251	3-(2-Naphthyl)alanine
252	3-(2-Naphthyl)-D-alanine
253	3-(2-Pyridinyl)alanine
254	3-(2-Thienyl)alanine
255	3-(2-Thienyl)-D-alanine
256	3-(3-fluorophenyl)-5-(3-ethoxy-4-hydroxybenzylidene)-2-thioxothiazolidin-4-one
257	3-(3-Pyridinyl)alanine
258	3-(4-fluorophenyl)-5-(3-(allyloxy)-4-hydroxybenzylidene)-2-thioxothiazolidin-4-one
259	3-(4-fluorophenyl)-5-(3-ethoxy- 4-hydroxybenzylidene)-2-thioxothiazolidin-4-one
260	3-(4-Pyridinyl)alanine
261	3-(Aminomethyl)-D-phenylalanine
262	3-(pyridin-3-yl)-5-(3-ethoxy-4-hydroxybenzylidene)-2-thioxothiazolidin-4-one
263	3-(Trifluoromethyl)phenylalanine
264	3,3-dimethyl-13-{[1,2,3,4]tetrazolo[1,5-a]quinolin-4-yl}-2H,4H,13H-indazolo[1,2-b]phthalazine-1,6,11-trione
265	3,3-dimethyl-13-{7-methyl-[1,2,3,4]tetrazolo[1,5-a]quinolin-4-yl}-1H,2H,3H,4H,6H,11H,13H-indazolo[1,2-b]phthalazine-1,6,11-trione
266	3,3-dimethyl-13-{8-methyl-[1,2,3,4]tetrazolo[1,5-a]quinolin-4-yl}-1H,2H,3H,4H,6H,11H,13H-indazolo[1,2-b]phthalazine-1,6,11-trione
267	3,3-dimethyl-13-{9-methyl-[1,2,3,4]tetrazolo[1,5-a]quinolin-4-yl}-1H,2H,3H,4H,6H,11H,13H-indazolo[1,2-b]phthalazine-1,6,11-trione
268	3,3-Diphenyl-D-alanine
269	3,4-Dichloro-5-[(1,3-dichloropropan-2-yloxy)]-2(5H)-furanone
270	3,4-Dichloro-5-[(4-methylphenylsulfonyl)]-2(5H)-furanone
271	3,4-Dichloro-cinnamaldehyde
272	3,4-Dichlorophenylalanine
273	3,4-Dimethoxychalcone
274	3,5-dibromotyrosined
275	3,5-Difluoro-dl-phenylalanine
276	3,5-Diiodotyrosine
277	3,5-Dimethyl benzyl dodecyl beta-maltoside
278	3,5-dimethylaniline
279	3-[(prop-2-ene-1-sulfinyl)sulfanyl]prop-1-ene
280	3-{2-[(1S,2R,4aR,8aR)-1,2,4a,5-tetramethyl-1,2,3,4,4a,7,8,8a-octahydronaphthalen-1-yl]ethyl}-5-methylidene-N-phenyl-2,5-dihydrofuran-2-amine
281	3-{2-[(1S,2R,4aR,8aR)-1,2,4a,5-tetramethyl-1,2,3,4,4a,7,8,8a-octahydronaphthalen-1-yl]ethyl}-N-(2-fluorophenyl)-5-methylidene-2,5-dihydrofuran-2-amine
282	3-{2-[(1S,2R,4aR,8aR)-1,2,4a,5-tetramethyl-1,2,3,4,4a,7,8,8a-octahydronaphthalen-1-yl]ethyl}-N-(3-fluorophenyl)-5-methylidene-2,5-dihydrofuran-2-amine
283	3-Amino-4-(2,4-difluorophenyl)-2-butanone
284	3beta-Hydroxyolean-12-en-28-al 3-p-coumarate
285	3-bromo-5-methoxy-4-[(4-methylphenylsulfanyl)]-2(5H)-furanone
286	3-Bromophenylalanine
287	3-Carbamoylphenylalanine
288	3-Chloro-5-[(2-chloroethoxy)]-4-[(4-methylphenylsulfanyl)]-2(5H)-furanone
289	3-chloro-5-hydroxy-4-[(4-methylphenylsulfanyl)]-2(5H)-furanone
290	3-chloro-5-hydroxy-4-[(4-methylphenylsulfonyl)]-2(5H)-furanone
291	3-Chlorotyrosine
292	3-fluoroaniline
293	3-Fluoro-DL-phenylalanine
294	3-geranyl-1-(2-methylbutanoyl)phloroglucinol
295	3-geranyl-1-(2-methylpropanoyl)phloroglucinol
296	3-hexyl-4-bromo-5-methylene-2(5H)-furanone
297	3-hexyl-5-bromomethylene-2(5H)-furanone
298	3-hydroxychalcone
299	3-Hydroxyphenylalanine
300	3-Hydroxytyrosine
301	3-indolylacetonitrile
302	3-Iodotyrosine
303	3-Methoxychalcone
304	3-Methoxy-D-Phenylalanine
305	3-Methyl-D-phenylalanine
306	3-Nitro-D-tyrosine
307	3-Nitrophenylalanine
308	3-oxo-C6-HSL
309	3-oxo-C8-HSL
310	3-tetra- decanoyltetronic
311	3-tetradecanoylthiotetronic
312	4 alpha, 5 alpha-epoxy-10 alpha, 14H-1-epi-inuviscolide
313	4-(2-(5-(4,5-dibromo-1-methyl-1H-pyrrol-2-yl)-1,3,4-oxadiazol-2-yl)vinyl)-2-methoxyphenol
314	4-(2-methybutyryl)-4H-tomentosin
315	4-(5-(4,5-dibromo-1-methyl-1H-pyrrol-2-yl)-1,3,4-oxadiazole-2-yl)aniline
316	4-(Aminomethyl)-D-phenylalanine
317	4-(Trifluoromethyl)-D-phenylalanine
318	4,5-dihydroxy-2,3-pentanedione
319	4-Acetamido-D-phenylalanine
320	4-Amino-D-phenylalanine
321	4-Benzoylphenylalanine
322	4-Benzyl-sulfonyl-5-hydroxy-3-chloro-2(5H)-furanone
323	4-bromo-5-(bromomethylene)-3-(1-( 2-propynyloxy)butyl)-2(5H)-furanone
324	4-bromo-5-(bromomethylene)-3-(1-(2-(2-(2-azidoethoxy)ethoxy)ethoxy)butyl)-2(5H)-furanone
325	4-bromo-5-(bromomethylene)-3-(1-acetoxybutyl)-2(5H)-furanone
326	4-bromo-5-(bromomethylene)-3-(1-bromobutyl)-2(5H)-furanone
327	4-bromo-5-(bromomethylene)-3-butyl-2(5H)- furanone
328	4-bromo-5-(dibromomethylene)-3-(1-acetoxyoethyl)-2(5H)-furanone
329	4-bromo-5-(dibromomethylene)-3-(1-bromoethyl)-2(5H)-furanone
330	4-bromo-5-(dibromomethylene)-3-ethyl-2(5H)-furanone
331	4-bromoaniline
332	4-Bromo-D-phenylalanine
333	4-Br-PHL
334	4-Chloro-2-fluoro-DL-phenylalanine
335	4-chloro-7-(trifluoromethyl)quinoline
336	4-chloroaniline
337	4-Chlorochalcone
338	4-chloroquinoline
339	4-Cyanophenylalanine
340	4-dimethyl-amino-cinnamaldehyde
341	4-Ethylcatechol
342	4-Ethylguaiacol
343	4-Fluoro-(S)-4,5-Dihydroxypentane-2,3-dione
344	4-Fluoro-2-methyl-D-phenylalanine
345	4-Fluoro-D-phenylalanine
346	4-fluoroindole
347	4H-tomentosin
348	4-Hydroxy benzoate
349	4-hydroxy coumarin
350	4-Hydroxy-2,5-dimethyl-3(2H)-furanone
351	4-Hydroxychalcone
352	4-Iodo-d-phenylalanine
353	4-methanesulfonylaniline
354	4-Methoxycarbonylphenylboronic acid
355	4-Methoxychalcone
356	4-methoxy-cinnamaldehyde
357	4-Methyl benzyl dodecyl beta-maltoside
358	4-Methylphenylalanine
359	4-nitro-cinnamaldehyde
360	4-Nitro-D-phenylalanine
361	4-nitropyridine N -oxide
362	4-Phenyl-N-((2R,3R,4S,5S,6R)-2,4,5-trihydroxy-6-(hydroxymethyl)tetrahydro-2H-pyran-3-yl)butanamide
363	4-tertiary butyl benzyl decyl beta-maltoside
364	4-tertiary butyl benzyl dodecyl beta-maltoside
365	5 alpha-Epoxyalantolactone
366	5- hydroxyethyl-3-tetradecanoyltetramic acid
367	5-(4,5-dibromo-1-methyl-1H-pyrrol-2-yl)-1,3,4-oxadiazole-2-thiol
368	5-(dibromomethylene)-3-(1-acetoxyethyl)-2(5H)-furanone
369	5-(dibromomethylene)-3-(1-bromobutyl)-2(5H)-furanone
370	5-(dibromomethylene)-3-(1-bromoethyl)-2(5H)-furanone
371	5-(dibromomethylene)-3-butyl-2(5H)-furanone
372	5-(dibromomethylene)-3-ethyl-2(5H)-furanone
373	5-(dibromomethylene)-3-hexyl-2(5H)-furanone
374	5,7,8,4-Tetramethoxyflavone
375	5,8,11,14-Eicosatetraynoic acid
376	5-Bicyclic brominated furanones
377	5-Bromo-1-(2-chloroacetyl)indoline-2,3-dione
378	5-Bromoindole
379	5-bromomethylene-2 (5H)-furanone
380	5-Chloro-1-(2-chloroacetyl)indoline-2,3-dione
381	5-Chloroindole
382	5-decyl-1,3-thiazolidine-2,4-dione
383	5-Fluorocytosine
384	5-fluoroindole
385	5-fluorooxiindole
386	5-Fluorouracil
387	5-Hydroxy-4-[(4-methylphenyl)sulfonyl]-3-chloro-2(5H)-furanone
388	5-octyl-1,3-thiazolidine-2,4-dione
389	6-(4-chlorophenyl)-1,3-dimethyl-5-[3-(4-methylphenyl)-1-phenyl-1H-pyrazol-4-yl]-1H,2H,3H,4H,5H,6H-pyrimido[4,5-d][1,3]diazine-2,4-dione
390	6-Amino Penicillinic acid
391	6-Aminoflavone
392	6-Bicyclic brominated furanones
393	6-Chloroindole
394	6-Chlorooxindole
395	6-fluoroindole
396	6-Gingerol
397	6-hydroxyflavone
398	6-MO-LF11-215
399	6-MO-LF11-227
400	6-MO-LF11-322
401	7-Bicyclic brominated furanones
402	7-bromoindole
403	7-chloroindole
404	7-chloroquinolin-4-ol
405	7-fluoroindole
406	7-fluoroindoline-2,3-dione
407	7-formylindole
408	7-hydroxyindole
409	7-methoxyindole
410	7-methylindole
411	7-nitroindole
412	7P-AC
413	8-fluoroquinoline
414	9-hydroxy-2-propyl-4H-pyrido[1,2-a]pyrimidin-4-one
415	A-3
416	AAP2
417	Abacavir
418	Aceroside VIII
419	Acetohydroxamic Acid
420	Acetycholine
421	Aciclovir
422	Adamantane dodecyl beta-maltoside
423	Adefovir Dipivoxil
424	AFP1
425	Ajoene
426	Albendazole
427	Alexidine dihydrochloride
428	Allicin
429	Aloe Vera Gel
430	Aloe-emodin
431	alpha-costic acid
432	alpha-Defensin-3
433	alpha-Humulene
434	alpha-Longipinene
435	alpha-mangostin
436	alpha-Pinene
437	alpha-tocopherol
438	Amantadine
439	Amikacin
440	Amikacin disulfate salt
441	Aminocyclopropane
442	Aminosalicylic Acid
443	Amlodipine
444	Amoxicillin
445	Amphotericin B
446	Ampicillin
447	Amprenavir
448	Anidulafungin
449	Aniline
450	Anthraflavic acid
451	Anthranilate
452	Apigenin
453	Apramycin
454	Arbekacin
455	Asperdiol
456	Asperdiol acetate
457	Aspirin
458	Atazanavir
459	Atovaquone
460	Auranofin
461	Autoinducer-2
462	Avermectin B1a
463	Avibactam
464	Azidocillin
465	Azithromycin
466	Azlocillin
467	Aztreonam
468	Bac8C
469	Bacalin hydrate
470	Bacampicillin
471	Bacitracin
472	Bactenecin
473	Baicalein
474	Baicalin
475	Bedaquiline
476	Benzalacetone
477	Benzathine benzylpenicillin
478	Benzbromarone
479	Benzenesul-fonamide,4-amino-N-methyl-N-[3-(3,4,7,8-tetrahydro-2,4-dioxo-2H-thiopyrano[4,3-d]pyrimidin-1(5H)-yl)propyl
480	Benzethonium chloride
481	Benzocaine
482	Benzophenonyl decyl beta-maltoside
483	Benzoylperoxide
484	Benzyl decyl beta-maltoside
485	Benzylpenicillin
486	Bergamottin
487	Besifloxacin
488	beta-6-20-G3K6
489	beta-Caryophyllene
490	beta-Defensin-1
491	beta-Defensin-3
492	beta-Pinene
493	beta-sitosterol glucoside
494	Betulin
495	Betulinic acid
496	Bevirimat
497	Bifonazole
498	Biphenyl
499	Bis[(4-methylphenyl)methyl] disulfide
500	BisEDT-RIP
501	Bismuth oxide nanoparticle
502	Bis-O-acetyl-4,5-dihydroxy-2,3-pentanedione
503	BMAP-18
504	BMAP-27
505	BMAP-28
506	Brecanavir
507	Bromohexylmaleic anhydride
508	Bromophenyl AHL
509	BS-34
510	Butane-1,4-diamine
511	Butanol
512	Butein
513	Butenafine hydrochloride
514	Butoconazole
515	Butoconazole nitrate
516	Butyl gallate
517	C12HSL
518	C16-33
519	C16G2
520	C4-HSL
521	C6-HSL
522	C8-HSL
523	Cadmium Ion
524	Caffeic Acid
525	Caffeine
526	Calanolide A
527	Calcium chloride
528	CAMA
529	Camphene
530	Capreomycin
531	Carabrol
532	Carabrone
533	Carbonyl cyanide m-chlorophenylhydrazone
534	Carboxymethyl chitosan
535	Carminic acid
536	Carnitine hydrochloride
537	Carolacton
538	Carvacrol
539	Caspofungin
540	cat-AGE-RK1
541	cat-AGE-RK2
542	Catechin
543	Catechin gallate
544	Cathelicidin
545	Cecropin (1-7)-melittin A (2-9) amide
546	Cecropin B
547	Cefacetrile
548	Cefaclor
549	Cefadroxil
550	Cefalonium
551	Cefalotin
552	Cefamandole
553	Cefapirin
554	Cefazolin
555	Cefditoren
556	Cefepime
557	Cefixime
558	Cefmenoxime
559	Cefmetazole
560	Cefonicid
561	Cefoperazone
562	Ceforanide
563	Cefotaxime
564	Cefotetan
565	Cefotiam
566	Cefoxitin
567	Cefpiramide
568	Cefpodoxime
569	Cefprozil
570	Ceftazidime
571	Ceftazidime hydrate
572	Ceftizoxime
573	Ceftobiprole
574	Ceftriaxone
575	Cefuroxime
576	Cephalexin
577	Cephaloglycin
578	Cerulenin
579	CGP-37157
580	Ch Dhvar5 ads
581	Ch_GG_Nt-Dhvar5
582	Chelerythrine
583	Chitosan
584	Chloramphenicol
585	Chlorhexidine
586	Chlorhexidine acetate
587	Chloroxine
588	Chlorpromazine
589	Chromate
590	Chrysin
591	Chrysophanol
592	Chrysophsin-1
593	Ciclopirox ethanolamine
594	Cidofovir
595	Cinnamaldehyde
596	Cinnamic acid
597	Cinnamon oil
598	Cinoxacin
599	Ciprofloxacin
600	Ciprofloxacin lactate
601	cis-2-dodecenoic acid
602	cis-4-Hydroxy-L-proline
603	cis-Stillbene
604	Citral
605	Citropin 1.1
606	Clarithromycin
607	Clary sage
608	Clary sage oil
609	Clavulanate
610	Clindamycin
611	Clioquinol
612	Clofazimine
613	Clomocycline
614	Clotrimazole
615	Clove oil
616	Cloxacillin
617	Clozapine
618	Cobalt Ion
619	Coladonin
620	Colistin
621	Colistin sodium methanesulfonate
622	Colostrum Hexasaccharide
623	Competence Stimulating Peptide
624	Copper sulfate
625	Coprinuslactone
626	Coumarin
627	Coumarin-3-carboxylic acid
628	cov-GK7-NH2
629	cov-GL13K
630	CRAMP
631	Crocin
632	CSP
633	CSP-C16
634	Curcumin
635	CWR11
636	Cyanidin
637	Cyclacillin
638	cyclo(Trp-Ser)
639	Cyclobutanamine
640	cyclophosphamide
641	Cycloserine
642	Cynarin
643	D, L- K6L9
644	D/L-Aspartate
645	D-2-aminoadipic acid
646	D-2-Methylphenylalanine
647	Daclatasvir
648	Daidzein
649	D-Alanine
650	Dalbavancin
651	Dalfopristin
652	Danthron
653	Dapsone
654	Daptomycin
655	Darunavir
656	DASamP1
657	D-Asparagine
658	D-Aspartate
659	D-Aspartic acid
660	D-Citrulline
661	D-Cystine
662	DD13
663	Decanediol
664	Decyl beta-maltoside
665	Delavirdine
666	Delphinidin
667	Demeclocycline
668	den-SB056
669	den-SB056-1
670	Dephnetin
671	Desipramine
672	Dezocine
673	dF17-6K
674	dF21-10K
675	D-galactose cluster
676	D-glutamine
677	D-Histidine
678	Diazepam
679	Dibenzyl disulphide
680	Dibenzyl sulphide
681	Dichloromethane
682	Dicinnamyl
683	Diclofenac sodium
684	Dicloxacillin
685	Dicyclohexylamine
686	Didanosine
687	digoxin
688	DiHydroxyBenzoFuran
689	Dihydroxybenzoic Acid (2,3-DHBA)
690	Dihydroxybenzoic Acid (2,4-DHBA)
691	Dihydroxybenzoic Acid (3,4-DHBA)
692	Di-MB-LF11-215
693	Di-MB-LF11-322
694	Dimethyl Sulfoxide
695	Diphenyl diselenide
696	Diphenyl disulphide
697	Diphenyl methane
698	Dirithromycin
699	DispersinB-KSL-W wound gel
700	Diterpene phytol
701	Djenkolic acid
702	DJK5
703	DJK6
704	D-Leucine
705	D-LL-37
706	D-Methionine
707	Dodecyl beta-maltoside
708	Dolutegravir
709	Doripenem
710	Doxycycline
711	D-Phenylalanine
712	D-Proline
713	D-tert-Leucine
714	D-Tryptophan
715	D-Tyrosine
716	Econazole
717	Econazole nitrate
718	Efavirenz
719	Elemental silver
720	Ellagic Acid
721	Elliptophenone A
722	Emodin
723	Emtricitabine
724	Enalapril
725	Enfuvirtide
726	Enoxacin
727	Ephedrine
728	Epicatechin
729	Epicatechin gallate
730	Epicatechin-3-gallate
731	Epigallocatechin
732	Epigallocatechin Gallate
733	epsilon-Polylysine
734	epsilon-viniferin
735	Ertapenem
736	Erythritol
737	Erythromycin
738	Esculentin
739	Esculetin
740	Esculin
741	Esculin hydrate
742	Esomeprazole
743	Ethambutol
744	Ethane-1,2-diamine
745	Ethyl acetate
746	Ethyl gallate
747	Ethylene glycol tetraacetic acid
748	Ethylenediametetraacetic acid
749	Eucarobustol E
750	Eugenol
751	Evodiamine
752	F2,5,12W
753	Farnesol
754	faropenem medoxomil
755	Fenclonine
756	Ferric chloride
757	Ferrous
758	Ferulic Acid
759	FK506
760	Flavone
761	Flavonoids 3
762	Flavonoids 7
763	Fleroxacin
764	Floxacillin
765	Flucloxacillin
766	Fluconazole
767	Fluperlapine
768	Fluspiriline
769	Fosamprenavir
770	Fosaphenytoin
771	Fosfomycin
772	Framycetin
773	Fraxin
774	FS8
775	Furanone
776	Furanone 56
777	Furanone C-30
778	Furanone F202
779	Furanone-2
780	Furanone-3
781	Furanone-5
782	Furanone-6
783	Furanone-8
784	Furvina
785	Fusidic Acid
786	FV7
787	G H12
788	G10KHc
789	G2
790	Gallic Acid
791	Gallium cation
792	Gallium Nitrate
793	Gallocatechin
794	Gallocatechin gallate
795	Ganciclovir
796	Garlic extract
797	Gatifloxacin
798	Gemifloxacin
799	Genistein
800	Gentamicin
801	Ginger oil
802	GL13K
803	Glipizide
804	Glucose
805	Glycinamide hydrochloride
806	Glycomonoterpenes (G-citral)
807	Glycomonoterpenes (G-citron)
808	Gossypetin hexamethyl ether
809	Grepafloxacin
810	Guaiacol
811	GW 5074
812	GW-9662
813	HA14-1
814	Hamamelitannin
815	HE10
816	HE12
817	HE4
818	Hepcidin 20
819	Heptadecanoic acid
820	Heptamethoxyflavone
821	Hesperetin
822	Hesperidin
823	Hetacillin
824	Hexachlorophene
825	Hexameric peptide
826	Hexyl gallate
827	Hinokitiol
828	Histatin 5
829	hLF1-11
830	Holothuroidin 1
831	Holothuroidin 2
832	Hsn5 12-mer
833	Human beta-defensin 3
834	Hydnocarpin D
835	Hydrogen peroxide
836	Hypericin
837	Hyperoside
838	Ibuprofen
839	Idoxuridine
840	IDR-1018
841	IG-13
842	IG-19
843	IG-25
844	Imazalil
845	IMB-2
846	Imipenem
847	Imperatorin
848	Indinavir
849	Indirubin
850	Indol AHL
851	Indole
852	Indole-3-acetaldehyde
853	Indole-3-acetamide
854	Indole-3-acetic acid
855	Indole-3-carboxyaldehyde
856	Indole-7-carboxylic acid
857	Indolicidin
858	Ionic silver
859	Irinotecan
860	Isatin
861	Isobutanol
862	Isoconazole
863	Isoeugenol
864	Isohydnocarpin
865	Isoliquiritigenin
866	Isoniazid
867	Isopropanol
868	Isoriccardin C
869	Isosilybin A
870	Isosinensetin
871	Isothiocyanate
872	Itraconazole
873	Ivalin
874	Josamycin
875	K4-S4
876	KABT-AMP
877	Kaempherol
878	Kanamycin
879	kappa-Pyrosulfite
880	Kaurenoic acid
881	KD-13
882	Ketoconazole
883	knightine
884	Kojic acid
885	KSL
886	KSL-W
887	KT2
888	L- K6L9
889	L-2-Bromophenylalanine
890	L-4-Carbamoylphenylalanine
891	L-744,832
892	Lactoferricin B
893	Lamivudine
894	Lanthanum chloride
895	L-Aspartate
896	Latamoxef
897	L-Canavanine
898	L-carnosine
899	L-cysteic acid
900	Lemon
901	Lemon oil
902	Levofloxacin
903	LF11-215
904	LF11-227
905	LF11-322
906	LF11-324
907	LFampin
908	Lfcin
909	L-fucose cluster
910	Limonene
911	Linalool
912	Linezolid
913	lin-SB056
914	lin-SB056-1
915	Lipoic acid
916	Listerine
917	L-K6
918	LL-13
919	LL13-37
920	LL-19
921	LL-25
922	LL-31
923	LL-37
924	LL7-37
925	Lomefloxacin
926	Lopinavir
927	Lorazepam
928	L-ornithine hydrochloride
929	Losartran
930	L-Phenylalanine
931	L-Phenylalanine-D-Lysine
932	L-Phenylalanine-L-Lysine
933	L-pipecolic acid
934	L-tryptophan
935	L-Tyrosine
936	Luteolin
937	Lymecycline
938	Lys-a1
939	Lysozyme
940	M8-33
941	M8G2
942	Macromomycin B
943	Magainin-I
944	Magainin-II
945	Malabaricone C
946	Mefloquine
947	Melittin
948	Melittin B
949	Menthol
950	Merimepodib
951	Meropenem
952	Meta-bromo-thiolactone
953	meta-toluidine
954	Methacycline
955	methanesulfonylbenzene
956	Methanol
957	Methyl benzethonium chloride
958	Methyl eugenol
959	Methyl gallate
960	Methyl indole-7-carboxylate
961	Methylthiopropylamine
962	Meticillin
963	Metronidazole
964	Mezlocillin
965	Micafungin
966	Miconazole
967	Midazolam
968	Minocycline
969	Mitomycin C
970	Monensin sodium salt
971	Moxifloxacin
972	MUC7 12-mer-D
973	MUC7 12-mer-L
974	MUC7 12-mer-L4
975	MUC7 20-mer
976	Mucobromic acid
977	Mucochloric acid
978	Mustard oil
979	Myricetin
980	Myricitrin
981	Myristic acid
982	Myristoyl-DL-carnitine
983	Myrrh oil
984	Myxinidin
985	Myxinidin1
986	Myxinidin2
987	Myxinidin3
988	N -(3-nitro-4-hydroxy-benzylidene)benzohydrazide
989	N -(4-trifluoromethyl-benzylidene)benzohydrazide
990	N -(5-bromo-2-hydroxy-benzylidene)benzohydrazide
991	N -(pyridin-3-yl-methylene)benzohydrazide
992	N -[(3-chloro-isoquinolin-4-yl)methylene] benzohydrazide
993	N 3-(2-thienylcarbonyl)-4-bromo-1,5-dimethyl-1H-pyrazole-3-carbohydrazide
994	N-((1E)-{4-ethoxy-3-[(8-oxo-1,5,6,8-tetrahydro-2H-1,5-methanopyrido[1,2-a][1,5]diazocin-3(4H)-yl)methyl]phenyl}methylene)-3,4,5-trihydroxybenzohydrazide
995	N-((2R,3R,4S,5S,6R)-2,4,5-Trihydroxy-6-(hydroxymethyl)tetrahydro-2H-pyran-3-yl)butyramide
996	N-((2R,3R,4S,5S,6R)-2,4,5-Trihydroxy-6-(hydroxymethyl)tetrahydro-2H-pyran-3-yl)dodecanamide
997	N-((2R,3R,4S,5S,6R)-2,4,5-Trihydroxy-6-(hydroxymethyl)tetrahydro-2H-pyran-3-yl)hexanamide
998	N-((2R,3R,4S,5S,6R)-2,4,5-Trihydroxy-6-(hydroxymethyl)tetrahydro-2H-pyran-3-yl)octanamide
999	N-(1,3-benzothiazol-2-yl)butanamide
1000	N-(1,3-Thiazol-2-yl)butanamide
1001	N-(2-oxothiolan-3-yl)butanamide
1002	N-(2-Pyridinyl)butanamide
1003	N-(2-Pyrimidinyl)butanamide
1004	N-(4,5-Dihydro-1,3-thiazol-2-yl)butanamide
1005	N-(4-Bromobenzylidene)benzohydrazide
1006	N-(4-hydroxy-2-methylphenyl)-3-oxododecanamide
1007	N-(4-Hydroxyphenyl)butanamide
1008	N-(4-Morpholinyl)butanamide
1009	N-(4-Pyridinyl)butanamide
1010	N-(5-Methyl-1,2-oxazol-3-yl)butanamide
1011	N-(6-tert-butyl-2,3-dihydro- 2-methylpyridazin-4-yl)-5-chlorothiophene-2-carbohydrazide
1012	N-(pyrrolidin-3-yl)dodecanamide
1013	N-[(3-chloro-isoquinolin-4-yl)methylene]benzohydrazide
1014	N-[5-(6-amino-9H-purin-9-yl)-4-hydroxy-2-(hydroxymethyl)oxolan-3-yl]-3-(4-methoxyphenyl)propanamide
1015	N1-(7-chloroquinolin-4-yl)dodecane-1,12-diamine
1016	N1-(7-chloroquinolin-4-yl)ethane-1,2-diamine
1017	N1-(7-chloroquinolin-4-yl)octane-1,8-diamine
1018	N1-[7-(trifluoromethyl)quinolin-4-yl]dodecane-1,12-diamine
1019	N1-[7-(trifluoromethyl)quinolin-4-yl]ethane-1,2-diamine
1020	N1-[7-(trifluoromethyl)quinolin-4-yl]octane-1,8-diamine
1021	NA10
1022	NA12
1023	NA8
1024	NA8H
1025	Na-Benzoate
1026	NA-CATH
1027	NA-CATH-ATRA1-ATRA1
1028	N-Acetylcysteine
1029	NaCl
1030	Nafcillin
1031	Na-Propionate
1032	Na-Pyrosulfite
1033	Naringenin
1034	Naringin
1035	N-Decanoyl cyclopentylamide
1036	N-decanoyl-L- homoserine benzyl ester
1037	Nelfinavir
1038	Neoeriocitrin
1039	Neohesperidin
1040	Neomycin
1041	Nerolidol
1042	N-Ethylacetanilide
1043	Netilmicin
1044	Nevirapine
1045	n-Hexane
1046	Niacinamide
1047	Niclosamide
1048	nimesulide
1049	Nisin
1050	Nitazoxanide
1051	nitrazepam
1052	Nitrofural
1053	Nitrofurantoin
1054	n-Methyl-D-valine
1055	N-Nonanoyl-cyclopentylamide
1056	Nobiletin
1057	Nodakenetin
1058	Norbgugaine 12
1059	Norfloxacin
1060	Norgestimate
1061	Norpinguisone
1062	Norspermidine
1063	Novobiocin
1064	NRC-16
1065	Nystatin
1066	O-(2,6-Dichlorobenzyl)-D-tyrosine
1067	Octadecyl gallate
1068	Octameric peptide
1069	octane-1,8-diamine
1070	Octyl gallate
1071	Ofloxacin
1072	OHC10HL
1073	OHC8HL
1074	Oleanolic Acid
1075	Oleic Acid
1076	O-LF11-215
1077	O-LF11-227
1078	Olive oil
1079	Olmesartran
1080	O-Methyl-D-tyrosine
1081	Orange extract
1082	Oregano oil
1083	Oseltamivir
1084	OSIP108
1085	Oxacillin
1086	Oxantel
1087	Oxiconazole nitrate
1088	Oxyresveratrol
1089	Oxytetracycline
1090	P10
1091	P15-CSP
1092	P60.4Ac
1093	Palivizumab
1094	Palmitic acid
1095	Palmitoyl-DL-carnitine
1096	Pa-MAP
1097	Pantaprazole
1098	para-anisidine
1099	para-Benzoquinone
1100	para-ethoxyaniline
1101	para-ethylaniline
1102	para-toluidine
1103	Paromomycin
1104	Patulin
1105	p-Coumaric acid
1106	Pefloxacin
1107	Pelargonidin
1108	Penciclovir
1109	Penicillenol A1
1110	Penicillenol A2
1111	Penicillenol B1
1112	Penicillenol B2
1113	Penicillenol C1
1114	Penicillenol C2
1115	Penicillic acid
1116	Penicillin G
1117	Pentagalloylglucose
1118	Pentamethoxyflavone
1119	Pentanol
1120	Peppermint oil
1121	Peptide 1
1122	Peptide 1037
1123	PG-1
1124	Phenanthrene
1125	Phenobarbitone
1126	Phenol,2,4-bis(1,1-dimethylethyl)
1127	Phenoxymethylpenicillin
1128	Phenyl-arginine-b-naphthylamide
1129	Phenytoin
1130	Phloretin
1131	Phloridzin
1132	Phosphate
1133	Phosphorylserine
1134	Phylloseptin-1
1135	phys-GL13K
1136	Picolinic acid
1137	Pine needle oil
1138	Pinguisenol
1139	Piperacillin
1140	Piperacillin-Tazobactam
1141	Pivampicillin
1142	Pivmecillinam
1143	Platyphylloside
1144	Pleurocidin
1145	PLF
1146	p-nitrophenyl glycerol
1147	Polyethyleneimine
1148	Polymyxin B
1149	Polysorbate 80
1150	Posaconazole
1151	Povidone Iodine
1152	Praziquantel
1153	Pro-Gly
1154	Prolificin A
1155	prop-2-ene-1-SO-thioperoxol
1156	Propanol
1157	Propyl gallate
1158	Protamine sulphate
1159	Protocatechuic acid
1160	Pseudomonas Quinolone Signal
1161	Psoralen
1162	PTP-7
1163	Pyrazinamide
1164	Pyrimethamine
1165	Pyrimidinedione
1166	Pyrogallol
1167	Pyrvinium pamoate
1168	Quercetin
1169	Quercetin Dihydrate
1170	Quercetin-3-O-glucuronide
1171	Quinine
1172	Quinizarin
1173	Quinolin-8-ol
1174	Quinupristin
1175	Quinupristin/dalfopristin
1176	Raltegravir
1177	Raspberry KAS 434
1178	Reserpine
1179	Resorcinol
1180	Resveratrol
1181	R-FV-I16
1182	Rhein
1183	Rhodomyrtone
1184	RI-19
1185	Ribavirin
1186	Rifabutin
1187	Rifalazil
1188	Rifampicin
1189	Rifapentine
1190	Rilpivirine
1191	Rimantadine
1192	Ritonavir
1193	RK-19
1194	RK-25
1195	RK-31
1196	RNAIII-inhibiting Peptide
1197	Rosmarinic acid
1198	Rosoxacin
1199	RT2
1200	RTA3
1201	R-Thanatin
1202	Rufloxacin
1203	Rutaecarpine
1204	Rutin
1205	S-(2-Aminoethyl)-L-cysteine hydrochloride
1206	S-(2-thiazoyl)-L-cysteine
1207	S-(2-thienyl)-L-cysteine
1208	S-(4-tolyl)-L-cysteine
1209	S6L3-33
1210	Sage oil
1211	Salicylic Acid
1212	Sanguinarine
1213	Saquinavir
1214	S-carboxylmethyl-L-cysteine
1215	Scopoletin
1216	Scrambled LL-37
1217	Seg6D
1218	Seg6L
1219	Sennidin A
1220	Sertaconazole nitrate
1221	S-ethyl-L-cysteine
1222	Shikonin
1223	Siamycin I
1224	Silver dihydrogen citrate
1225	Silver Ion
1226	Silver nanoparticles
1227	Silver nanowires
1228	Silver nitrate
1229	Silver sulfadiazine
1230	Silver sulphate
1231	Silybin
1232	Simeprevir
1233	Sinapic acid
1234	Sinefungin
1235	Sinensetin
1236	Sm6(L1)2C
1237	Sm6(L2)B33
1238	Sm6(L3)2C
1239	SMAP-29
1240	S-methyl- L-cysteine
1241	Sodium ascorbate
1242	Sodium Chloride
1243	Sodium sulfate
1244	Sorbitol
1245	sorivudine
1246	S-OSIP108
1247	SP1
1248	Spermine
1249	S-phenyl-L-cysteine
1250	S-phenyl-L-cysteine sulfoxide
1251	S-propyl-L-cysteine
1252	SQ109
1253	Ssp (A4K-A11K)
1254	Stavudine
1255	Stearic acid
1256	Stilbene
1257	Streptomycin
1258	Streptorubin B
1259	Subtilosin
1260	Sucrose
1261	Sulbactam
1262	Sulconazole nitrate
1263	Sulfacetamide
1264	Sulfacytine
1265	Sulfadiazine
1266	Sulfadoxine
1267	Sulfalene
1268	Sulfamerazine
1269	Sulfamethazine
1270	Sulfamethizole
1271	Sulfamethoxazole
1272	Sulfamoxole
1273	Sulfanilamide
1274	Sulfaphenazole
1275	Sulfathiazole
1276	Sulfisoxazole
1277	Syringic acid
1278	Tachyplesin III
1279	Tangeretin
1280	Tangerine oil
1281	Tannic acid
1282	Taurine
1283	Tazobactam
1284	Tea tree oil
1285	Teichoplanin
1286	Telaprevir
1287	Telekin
1288	Telithromycin
1289	Tellurite
1290	Tenofovir
1291	Terconazole
1292	Terpinene-4-ol
1293	Tert-butanol
1294	Tet-20
1295	Tet-213
1296	Tet-26
1297	Tetracycline
1298	Tetrameric peptide
1299	Tetrazol-1-yl
1300	Thiazolidinedione-8
1301	Thimerosal
1302	Thiophenone TF101
1303	Thonzonium bromide
1304	Thymol
1305	Ticarcillin
1306	Tigecycline
1307	Tiliroside
1308	Timolol
1309	Tioconazole
1310	Tipranavir
1311	Titanium dioxide
1312	TMB-8
1313	TMC-151s C
1314	Tobramycin
1315	Tobramycin-bismuth-ethanedithiol
1316	Tomentosin
1317	Toremifene
1318	trans-2-dodecenoic acid
1319	trans-2-Nonenal
1320	trans-2-Pentenal
1321	trans-Resveratrol
1322	trans-Stillbene
1323	Tricaine
1324	Triclosan
1325	Triethyl[2-({10,15,20,24,26,29,31,33,34-nonakis[3-(triethylphosphaniumyl)propoxy]hexacyclo[21.2.2.2,.2,.2,.2]pentatriaconta-1(25),3(35),4,6(34),8,10,13,15,18,20,23,26,28,30,32-pentadecaen-4-yl}oxy)ethyl]phosphanium decabromide
1326	Triethyl[3-({33-[2-(triethylazaniumyl)ethoxy]-10,15,20,25,27,29,31,34-octakis[3-(triethylazaniumyl)propoxy]hexacyclo[21.2.2.2.2.2.2]pentatriaconta-1(25),3,5,8,10,13,15,18,20,23,26,28,30,32,34-pentadecaen-4-yl}oxy)propyl]azanium decabromide
1327	Trimethoprim-sulfamethoxazole
1328	Trimethoxyflavone
1329	Trimethyl(3-{4-[3-(trimethylazaniumyl)propoxy]phenoxy}propyl)azanium dibromide
1330	Trimethyl(3-{4-[3-(trimethylphosphaniumyl)propoxy]phenoxy}propyl)phosphanium dibromide
1331	Trimethyl[2-({10,15,20,24,26,29,31,33,34-nonakis[3-(trimethylphosphaniumyl)propoxy]hexacyclo[21.2.2.2,.2,.2,.2]pentatriaconta-1(25),3(35),4,6(34),8,10,13,15,18,20,23,26,28,30,32-pentadecaen-4-yl}oxy)ethyl]phosphanium decabromide
1332	Trimethyl[3-({33-[2-(trimethylazaniumyl)ethoxy]-10,15,20,25,27,29,31,34-octakis[3-(trimethylazaniumyl)propoxy]hexacyclo[21.2.2.2,.2,.2,.2]pentatriaconta-1(25),3,5,8,10,13,15,18,20,23,26,28,30,32,34-pentadecaen-4-yl}oxy)propyl]azanium decabromide
1333	Trovafloxacin
1334	Tyrosol
1335	Tyrphostin 9
1336	Tyrphostin AG1478
1337	TZD-C8
1338	Umbelliferone
1339	Undecanoic acid
1340	Undecyl beta-maltoside
1341	Uracil
1342	Ursolic acid
1343	Usnic acid
1344	Vancomycin
1345	Vanillic acid
1346	Vanillin
1347	Vanillylacetone
1348	Verapamil
1349	Vidarabine
1350	Viomycin
1351	Virginiamycin M1
1352	Virstatin
1353	Vitamin C
1354	Vitamin E
1355	Vitexin
1356	Voriconazole
1357	VS2
1358	VSL2
1359	W-7 Hydrochloride
1360	Wheat bran
1361	YC-1 compound
1362	Yohimbine hydrochloride
1363	Zalcitabine
1364	Zanamivir
1365	Zeaxanthin
1366	Zidovudine
1367	Zinc
1368	Zinc Dichloride
1369	Zinc Nitrate
1370	Zinc oxide
1371	Zinc sulfate
1372	ZnO nanoparticles
1373	Zotepine
